# Supplementary material
Source: PubMed Central journal article supplement (PMC397413)
Supplement: pnas_101_15_5506__3.pdf [file pnas_101_15_5506__3.pdf]

## Data Set 2

### RSA-TOOLS Results

LORE search: Using 750 bp of promoter and ACTCAACAA sequence as a seed

Training set: *IZH4*, *IZH2*, *HSP26*, *YGL039w*, *ERG3*, *PIR3*, *YO338w*, *HSP30*, *COS10*,  
*NCE103*, *AHP1*, *YGR161c*, *PDR3*, *OLE1*, *MGA2*, *HSP104*

Matrix Length: 9

Complement strand: include as a single sequence

At least one match in each sequence

MATRIX 3

Number of sequences = 16

Unadjusted information = 33.5596

Sample size adjusted information = 33.5596

$\ln(P \text{ value}) = -229.618$   $P \text{ value} = 1.89667\text{E-}100$

$\ln(\text{expected frequency}) = -120.061$   $\text{expected frequency} = 7.21564\text{E-}53$

A | 11 0 2 0 16 15 0 15 13

C | 0 13 0 16 0 0 14 0 0

G | 1 2 2 0 0 0 2 1 2

T | 4 1 12 0 0 1 0 0 1

1|1 : 1/1 ACTCAACAA

2|2 : 2/595 TGTCAACAG

3|3 : -3/636 GCTCAACAA

4|4 : -4/544 ACTCAAGAA

5|5 : 5/707 ATTCAACAA

6|6 : -6/254 TCGCAACAA

7|7 : 7/135 AGACAACAA

8|8 : 8/69 TCTCAAGAA

9|9 : 9/644 ACACAACAA

10|10 : 10/615 ACTCAACAG

11|11 : -11/283 ACTCATCAA

12|12 : -12/560 TCTCAACAA

13|13 : 13/496 ACTCAACGA

14|14 : -14/300 ACGCAACAA

15|15 : 15/408 ACTCAACAA

16|16 : 16/565 ACTCAACAT

| Map     | Type | ID     | Strand | Start | End  | Sequence           | Score | ln(P)  |
|---------|------|--------|--------|-------|------|--------------------|-------|--------|
| TIS11   | site | patser | R      | -304  | -296 | tctcTTCTTGACAgcac  | 5.72  | -7.74  |
| NCE103  | site | patser | R      | -182  | -174 | tctcTCGATGAGTaatt  | 5.74  | -7.76  |
| FIT2    | site | patser | D      | -698  | -690 | actgACTCAACGTtgat  | 5.88  | -7.84  |
| HSP26   | site | patser | D      | -16   | -8   | acaaACTAAACAAatta  | 5.95  | -7.9   |
| UBS1    | site | patser | D      | -709  | -701 | gtcgAATCAACAAcgaa  | 6.15  | -8.08  |
| YOL101c | site | patser | D      | -220  | -212 | ggcaGCTCAACATtatt  | 6.18  | -8.13  |
| YOL101c | site | patser | D      | -157  | -149 | atggTGTC AACAGctaa | 6.19  | -8.14  |
| ERG3    | site | patser | R      | -55   | -47  | cagtTTGTTGCATttgt  | 6.3   | -8.25  |
| AHP1    | site | patser | D      | -50   | -42  | gaaaTTTCAACAAacca  | 6.65  | -8.61  |
| PIR3    | site | patser | D      | -617  | -609 | cttaAGACAACAacggg  | 6.87  | -8.87  |
| YOL101c | site | patser | R      | -197  | -189 | aagcCTGTTGAGCtcaa  | 7.11  | -9.05  |
| OLE1    | site | patser | R      | -508  | -500 | aaagCTGTTGAGCgagc  | 7.11  | -9.05  |
| YOR338w | site | patser | D      | -683  | -675 | agacTCTCAAGAAatccg | 7.51  | -9.28  |
| COS10   | site | patser | D      | -111  | -103 | gcgcTGTC AACAAattd | 7.58  | -9.35  |
| YGL039w | site | patser | D      | -45   | -37  | tgagATTCAACAAAaat  | 7.62  | -9.43  |
| NCE103  | site | patser | R      | -469  | -461 | ttggTTGATGAGTgacc  | 7.88  | -9.66  |
| MGA2    | site | patser | D      | -187  | -179 | aaaaACTCAACATtttc  | 8.02  | -9.82  |
| ERG3    | site | patser | R      | -498  | -490 | ccttTTGTTGCGAttgt  | 8.06  | -9.93  |
| YGR161c | site | patser | D      | -256  | -248 | ctgtACTCAACGAtcat  | 8.2   | -10.02 |
| HSP26   | site | patser | R      | -208  | -200 | cacgTTCTTGAGTggta  | 8.48  | -10.11 |
| YOL002c | site | patser | R      | -116  | -108 | tccgTTGTTGAGCtctt  | 8.5   | -10.26 |
| HSP30   | site | patser | D      | -108  | -100 | tacaACACAACAaaaa   | 8.66  | -10.59 |
| COS10   | site | patser | D      | -137  | -129 | taaaACTCAACAGctgc  | 8.95  | -10.85 |
| PDR3    | site | patser | R      | -452  | -444 | gagaTTGTTGCGTaagc  | 9.03  | -11.07 |
| FTR1    | site | patser | D      | -521  | -513 | acgtTCTCAACAAtttt  | 9.37  | -11.36 |
| AHP1    | site | patser | R      | -192  | -184 | cataTTGTTGAGAggtt  | 9.37  | -11.36 |
| OLE1    | site | patser | D      | -344  | -336 | gaacACTCAACAAacct  | 10.34 | -12.05 |
| YMR045C | site | patser | R      | -550  | -542 | tcgtTTGTTGCCTtccc  | 7.23  | -9.18  |
| YMR046C | site | patser | R      | -550  | -542 | tcgtTTGTTGCCTtccc  | 7.23  | -9.18  |
| YJR026W | site | patser | D      | -392  | -384 | tttaTCGCAACAcaat   | 8.06  | -9.93  |
| YJR027W | site | patser | D      | -392  | -384 | tttaTCGCAACAcaat   | 8.06  | -9.93  |

Aft1p-binding site search: Using 750 b.p. of promoter and TGCACCCA sequence as a seed

Training set: *FIT3*, *FIT2*, *TAF1*, *TIS11*, *ENB1*, *ARN1*, *FTR1*, *FRE1*, *SIT1*, *FET3*, *HMX1*

Matrix Length: 8

Complement strand: include as a single sequence

## At least one match in each sequence

MATRIX 1

Number of sequences = 11

Unadjusted information = 29.6925

Sample size adjusted information = 29.6924

$\ln(P \text{ value}) = -132.3$   $P \text{ value} = 3.49169E-58$

$\ln(\text{expected frequency}) = -59.2477$   $\text{expected frequency} = 1.85808E-26$

|   |  |    |    |    |    |    |    |    |   |
|---|--|----|----|----|----|----|----|----|---|
| A |  | 0  | 1  | 0  | 11 | 0  | 0  | 0  | 6 |
| C |  | 0  | 0  | 11 | 0  | 11 | 11 | 11 | 0 |
| G |  | 0  | 10 | 0  | 0  | 0  | 0  | 0  | 0 |
| T |  | 11 | 0  | 0  | 0  | 0  | 0  | 0  | 5 |

|       |   |         |          |
|-------|---|---------|----------|
| 1 1   | : | 1/1     | TGCACCCT |
| 2 2   | : | -2/566  | TGCACCCT |
| 3 3   | : | 3/485   | TGCACCCT |
| 4 4   | : | -4/303  | TGCACCCA |
| 5 5   | : | 5/502   | TGCACCCA |
| 6 6   | : | 6/558   | TGCACCCA |
| 7 7   | : | 7/491   | TGCACCCA |
| 8 8   | : | -8/385  | TGCACCCT |
| 9 9   | : | 9/528   | TACACCCA |
| 10 10 | : | -10/562 | TGCACCCT |
| 11 11 | : | 11/500  | TGCACCCA |

| Map     | Type | ID     | Strand | Start | End  | Sequence         | Score | $\ln(P)$ |
|---------|------|--------|--------|-------|------|------------------|-------|----------|
| FIT2    | site | patser | D      | -250  | -243 | caaaTGCACCCCcct  | 7.41  | -9.81    |
| ENB1    | site | patser | D      | -138  | -131 | caatTGCACCCCtctg | 7.41  | -9.81    |
| FTR1    | site | patser | D      | -176  | -169 | tgaaTGCACCCGattd | 7.41  | -9.81    |
| YLR205c | site | patser | R      | -583  | -576 | ggtgCGGGTGCAagtt | 7.41  | -9.81    |
| YLR205c | site | patser | R      | -539  | -532 | agtcAGGGTGTAtgtg | 7.82  | -10.05   |
| FIT2    | site | patser | R      | -674  | -667 | gtagTGGGTGTActgt | 7.99  | -10.41   |
| FRE1    | site | patser | D      | -224  | -217 | ctaaTACACCCAattd | 7.99  | -10.41   |
| FIT3    | site | patser | D      | -286  | -279 | ttttTGCACCCTgttd | 10.28 | -10.97   |
| FIT3    | site | patser | R      | -186  | -179 | ggaaAGGGTGCAaaaa | 10.28 | -10.97   |
| FIT2    | site | patser | R      | -333  | -326 | gagcAGGGTGCAattd | 10.28 | -10.97   |
| FIT2    | site | patser | D      | -267  | -260 | acaaTGCACCCTaagt | 10.28 | -10.97   |
| FTR1    | site | patser | R      | -367  | -360 | ggccAGGGTGCAgaaa | 10.28 | -10.97   |
| SIT1    | site | patser | R      | -190  | -183 | tttgAGGGTGCAatct | 10.28 | -10.97   |
| FIT2    | site | patser | R      | -133  | -126 | taacTGGGTGCAgtat | 10.46 | -11.66   |

|         |      |        |   |                            |              |
|---------|------|--------|---|----------------------------|--------------|
| TAF1    | site | patser | R | -449 -442aaaaTGGGTGCAgttc  | 10.46 -11.66 |
| TIS11   | site | patser | D | -250 -243aaaaTGCACCCAcatt  | 10.46 -11.66 |
| TIS11   | site | patser | R | -175 -168cagtTGGGTGCAAttgt | 10.46 -11.66 |
| ENB1    | site | patser | D | -194 -187ttatTGCACCCAaatg  | 10.46 -11.66 |
| ARN1    | site | patser | D | -261 -254aaaaTGCACCCAtaaa  | 10.46 -11.66 |
| FET3    | site | patser | D | -252 -245aaagTGCACCCAtttg  | 10.46 -11.66 |
| YOL106w | site | patser | D | -415 -408aactTGCACCCTtgaa  | 10.28 -10.97 |
